# Supplementary material
Source: Elsevier journal article supplement (https://www.sciencedirect.com/science/article/pii/S1699258X20301911)
Supplement: mmc1 [file S1699258X20301911:mmc1.docx]

# Material suplementario

Anexo 1. Signos de sospecha de inmunodeficiencias (Sospecha de errores innatos de la inmunidad) (11) (12) (9)

| Incremento en la severidad y frecuencia de infecciones | Infecciones recurrentes respiratorias, gastrointestinal, del sistema nervioso central y abscesos profundos (hígado, pulmón y piel). |
| --- | --- |
| Infecciones por gérmenes oportunistas | Infecciones por *Ureaplasma urealyticum*, *Mycoplasma pneumoniae*, micobacteriosis atípica, tuberculosis resistente, histoplasmosis o cualquier germen oportunista |
| Síntomas de procesos autoinmune y autoinflamación. | Hiperplasias linfoides, hepatoesplenomegalia, granulomas, citopenias (neutropenias, linfopenias y trombocitopenias, anemia), síndrome de ojo seco, lupus eritematoso sistémico, hepatitis autoinmune, anemia hemolítica autoinmune u otra enfermedad autoinmune. Fiebre recurrente de origen desconocido. |
| Malignidad | Enfermedades malignas sobre todo linfomas |
| otros signos: | Historia familiar de inmunodeficiencia primaria, fallo del crecimiento o no aumento de peso, hipoganmaglobulinemia, prolongado uso de antibióticos endovenosos. Complicaciones después del uso de vacunas vivas atenuadas. |
| Signos de alarmas por sistemas | |
| Sistemas respiratorios | Infecciones respiratorias recurrentes de vías superiores y bajas: (bronquiectasia, bronquitis, bronquiolitis, anormalidades pulmonares intersticiales, enfermedad pulmonar obstructiva crónica) |
| Sistema digestivo | Infecciones gastrointestinales: diarreas crónicas o colitis por protozoos, bacterias, virus y hongos (rotavirus, enterovirus, salmonelosis persistente, *Clostridium difficile* y giardiasis recurrente). Enteropatías sin causa conocida, enfermedad inflamatoria intestinal. Dolor abdominal severo que simula un abdomen agudo. Infección hepatobiliar. |
| Sistema osteomioarticular | artritis/ osteomielitis |
| Desórdenes alérgicos / Atópia | Rinitis alérgica, asma bronquial y dermatitis atópica |
| Manifestaciones en Piel | Eczema, Infecciones recurrentes de la piel *por Staphylococcus aureus.* Persistente o recurrentes candidiasis o infecciones por otros hongos o herpes cutáneo. Diseminación de verrugas y molluscum. |
| Sistema nervioso central | Meningoencefalitis meningocócica, por herpes u hongos. |
